# Supplementary material for: Independent Pathways Can Transduce the Life-Cycle Differentiation Signal in Trypanosoma brucei
Source: PLoS Pathog. 2013 Oct 17;9(10):e1003689. doi: 10.1371/journal.ppat.1003689 (PMC3798605; doi:10.1371/journal.ppat.1003689)
Supplement: Text S1 — Supporting supplementary figures and legends referred to in this manuscript. (PDF) [file ppat.1003689.s002.pdf]

**Independent signalling mechanisms can transduce the life-cycle  
differentiation signal in *Trypanosoma brucei***

Balazs Szöör, Naomi A. Dyer, Irene Ruberto, Alvaro Acosta Serrano and  
Keith R. Matthews

## **Supplementary Data**

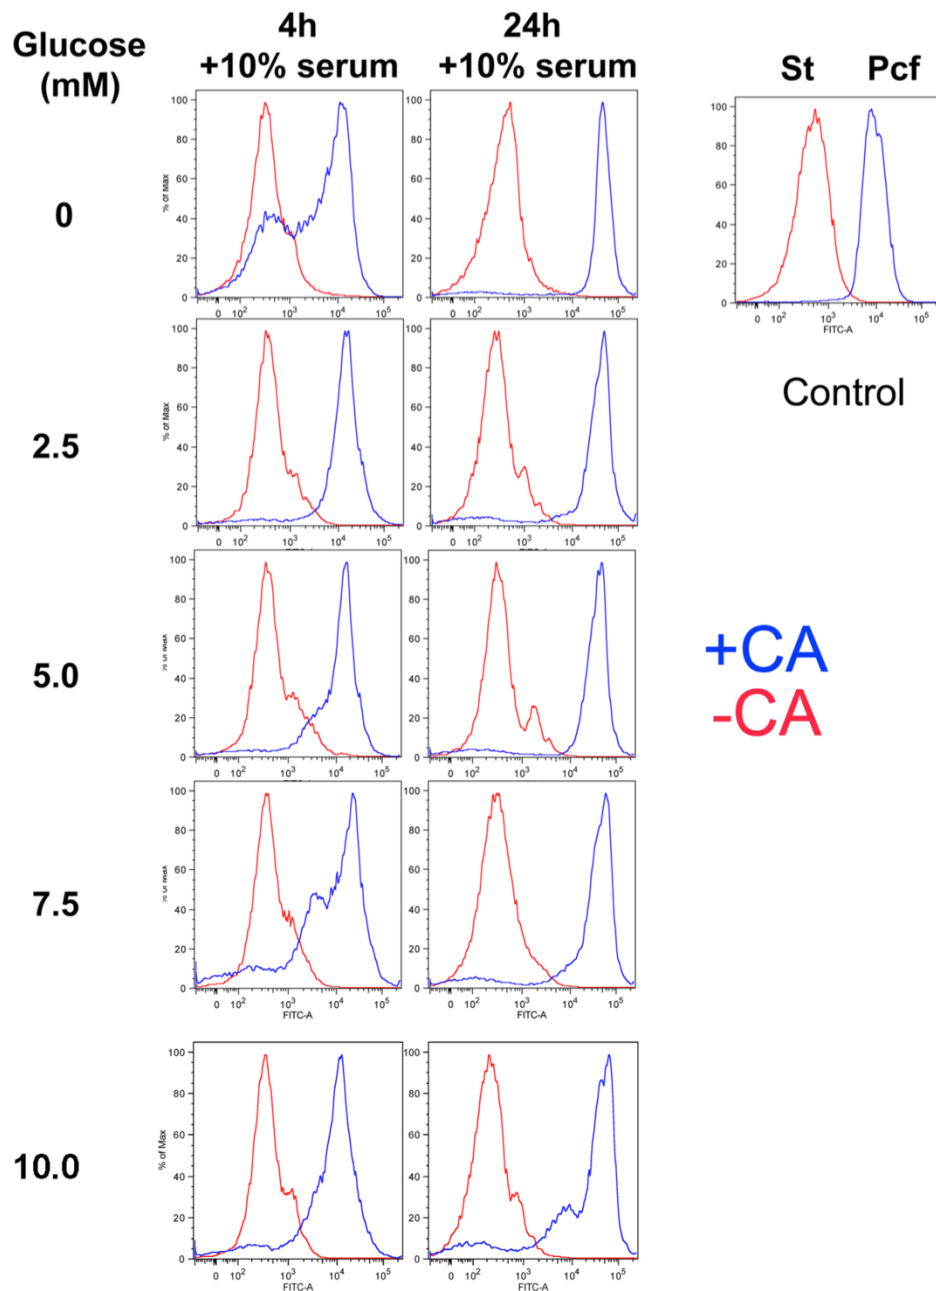

**Figure S1**

Glucose depletion does not stimulate the differentiation of stumpy form trypanosomes. Stumpy forms were incubated with 10% serum (approximately 0.5mM glucose final concentration) plus 0mM, 2.5mM, 5.0mM, 7.5mM or 10mM glucose in the presence (+CA) or absence (-CA) of 6mM *cis*-aconitate. In low glucose, no differentiation was observed, though the cells underwent efficient differentiation in the presence of CA. Without serum, the cells rapidly underwent cell death (not shown). Procyclin expression was monitored after 4h and 24h. Control assays were carried out also with stumpy form cells (red, right hand panel; negative control) or procyclic form cells (blue, right hand panel; positive control).

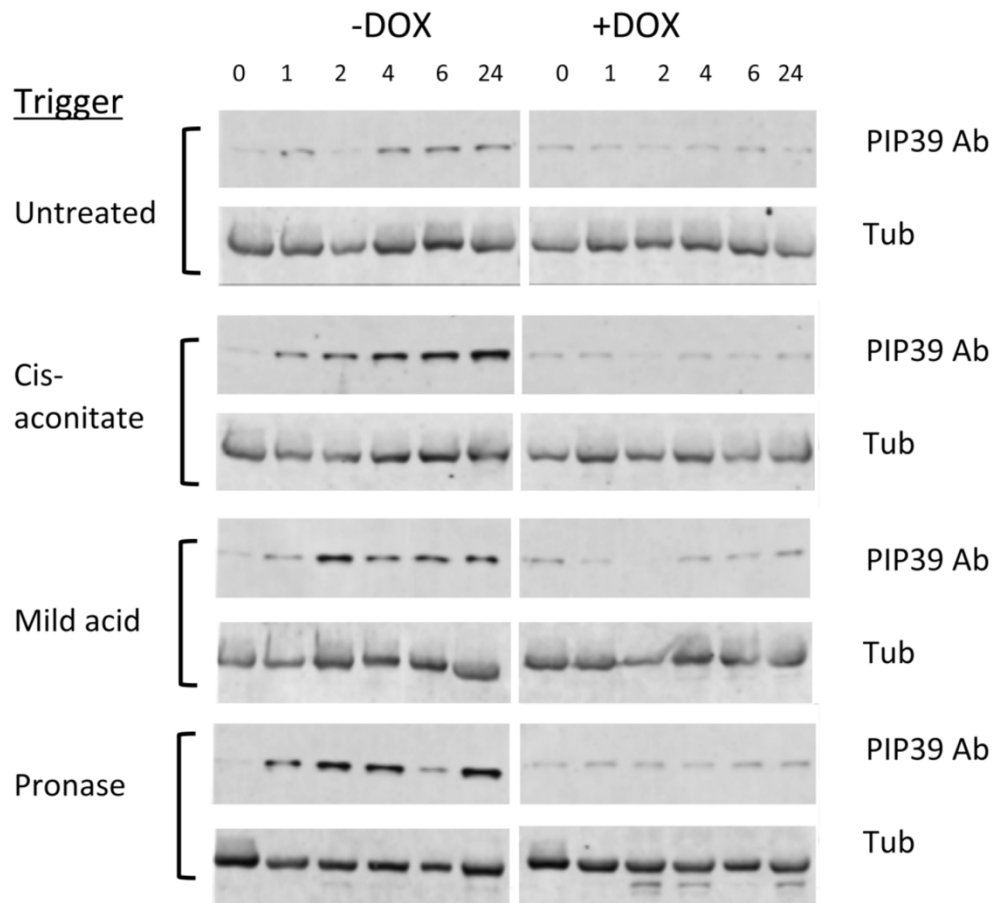

**Figure S2**

Western blots detecting *Tb*PIP39 from samples derived from *Tb*PIP39-RNAi stumpy cells, induced or uninduced with doxycycline during *in vivo* growth, and then exposed to cis-aconitate, mild acid, and pronase. Induction was retained after differentiation was stimulated by inclusion of tetracycline in the cell culture medium, with samples being prepared at the indicated times (in hours) thereafter. Western blots were reacted with the antibody against  $\alpha$ -tubulin (Tub) to show the relative loading in each case, and with antibody detecting *Tb*PIP39.

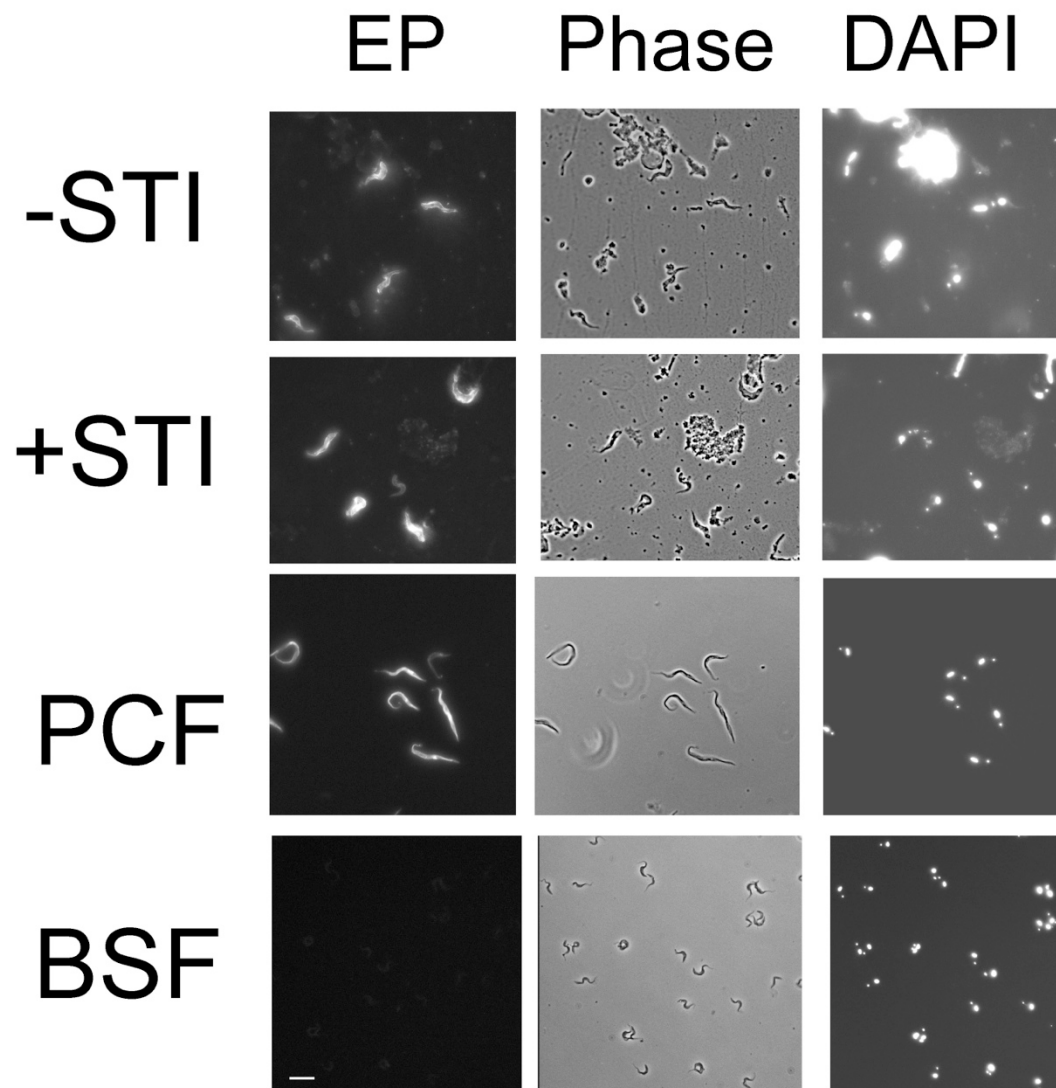

**Figure S3**

Trypanosomes in tsetse midgut extracts treated (+STI) or untreated (-STI) with Soybean trypsin inhibitor and probed for EP procyclin expression after 4 h. Controls of cultured procyclic forms and bloodstream forms are also shown. Exposures in the EP procyclin panels in each case were identical to allow comparison of relative staining. Bar= 10  $\mu$ m.

PIP39 ATGGTGAGGACGACACGCTTTTCACGCAACAGTTCCAAACCACTGTTTCAGCAATTACAG 60  
PIP39s atggttcgcacaaacacgcttttagccgcaacagcagcaagccactttttcagcagctgcag  
M V R T T R F S R N S S K P L F Q Q L Q 20

PIP39 CTTATTACATCGTATGGACTCTTTCAGGAGTATCCACCCATTGGTCACTTCCCCTTCCA 120  
PIP39s ctgattacgagctacggtctttttcaagagtacccgccaatttggagccttccacttcca  
L I T S Y G L F Q E Y P P I W S L P L P 40

PIP39 CCTCAACAACCTCGTGATACGGGAAAACCCACACTGGTGCTTGATATTGATGAAACACTG 180  
PIP39s ccacagcagccacgcgatacaggcaagccaacacttgtgctg**gacatcgac**gagacactt  
P Q Q P R D T G K P T L V L D I D E T L 60

PIP39 ATTCATACGTGTGGGATGCGGAATGAGGGGTCGGATTCTGTCTCCTTCAGTTTCTTCCTG 240  
PIP39s attcac**acagtg**ggcagtcgcgaacgaggttagtgatagtggtcgttttagctttttctg  
I H T V G M R N E G S D S V S F S F F L 80

PIP39 CGTCCACATGCGAAGGAATTTCTCGCGGAGGTACGTGAACGTGTACGAAGTTGTGTTCTGG 300  
PIP39s acgccgcagcgaagaatttcttgcaagaagtgcgcgagctgtacgaggtggtgttttg  
R P H A K E F L A E V R E L Y E V V F W 100

PIP39 ACGGCTGGTACCGCATCCTACTGCTCAGCTGTTATGGATGCACTGGAGGTGCAGGTGTTA 360  
PIP39s acagcagcacagcaagttactgcagtcagtgatggacgcgcttgaggtgcaagtgcctt  
T A G T A S Y C S A V M D A L E V Q V L 120

PIP39 CAACTCCCACGATCATTTTACAATATTGATGAACTCCGCGTAGAGGCACGTGGTGGAATC 420  
PIP39s cagcttccacgcagcttctacaacattgatgagcttcgtgtggaagcgcgcggtggtatt  
Q L P R S F Y N I D E L R V E A R G G I 140

PIP39 TCCACCAAGAATGTTAACTTCTATGCCCTTTCCCGAACTCAAACGTTACAAGGCATAAT 480  
PIP39s agtacgaagaacgtgaacttttacgcgcttagccgcacacagacacttcaggtgcacaac  
S T K N V N F Y A L S R T Q T L Q G H N 160

PIP39 TACATGAAATACCTTCCAATGCTTGGCAGACCATTGAATCGTGTCATAGTGATCGACAGT 540  
PIP39s tacatgaagtacttgccgatgcttggtcgcccgcttaaccgtgtgattgtgattgatagc  
Y M K Y L P M L G R P L N R V I V I D S 180

PIP39 GATGTACGCAGCTTTCCTCTTCATCCACGTAACGGTGTTAAGATCGAACCCCTTCTACCG 600  
PIP39s gacgtgcgcagttttccattgcacccacgtaattggcgtgaagattgagccatttcttcca  
D V R S F P L H P R N G V K I E P F L P 200

PIP39 AATGAACGTGTTTTATCCGAATATGCCCGCGTAGTAACCGATGAGGTGAAATATGGTCAA 660  
PIP39s aacgagcgcggtgttgagcgcagtcacgcagtggttacggatgaagtgaagtacggtcaa  
N E R V L S E Y A R V V T D E V K Y G Q 220

PIP39 GTTGGTCAGCGCAGTATGAAGGCGAAATGGCAAAAGTCATTGAGCGTGGTGAGGAGGAG 720  
PIP39s gtgggacaacgccagtcagagggggagatggcgaaagtgattgaacgcggagaggaagag  
V G Q R Q Y E G E M A K V I E R G E E E 240

PIP39 GTAGCGCGATTGCAAGCGGATCATGCCCTTATGGATCTGATTCCAATGCTACGCTCTGCG 780  
PIP39s gtggcagccttcaggcagatcacgcattgatggaccttattccgatgcttcgcagtgca  
V A R L Q A D H A L M D L I P M L R S A 260

PIP39 GCTTCTTCAACTGATTGACTCACGAATTAGACCATTGGCGTACGGATGAGTACACAAAG 840  
PIP39s gcaagcagcacagatcttacacacgagcttgatcactggcgacagacgagtacacgaaa  
A S S T D L T H E L D H W R T D E Y T K 280

PIP39 TGTGACGACTTTCGTGAAACGATGAACCTCTCTCAGTGACAAGGCAGAAGATTCTTGGT 900  
PIP39s tgtgatgatttccgcgagacaatgaacagccttagtgtagcgcgcaaaagattctgggc  
C D D F R E T M N S L S V T R Q K I L G 300

PIP39 AATGTTCTTAAGGAGCGACGCAACGTACCGATTCCGCCTCTCAAGCAGCACGTGATGAAT 960  
PIP39s aacgtgctgaaagaacgccgtaacgtgcccaattccaccgttgaaagcaacatgtgatgaac  
N V L K E R R N V P I P P L K Q H V M N 320

PIP39 CATGGATTTATGGAGGAGGCAAATGCCGCTATGAAGTTGGAGCAGATGCGACACACTCCT 1020  
PIP39s cacggtttcatggaagaggcgaacgcagcaatgaagctcgagcaaatgcgtcacacacca  
H G F M E E A N A A M K L E Q M R H T P 340

PIP39 TCAAGACTTTAG 1032  
PIP39s agtcgtctt  
S R L 343

**Figure S4**

Gene sequence of *Tb*PIP39 and recoded *Tb*PIP39 mutants where predicted citrate binding residues (in bold and underlined) are mutated

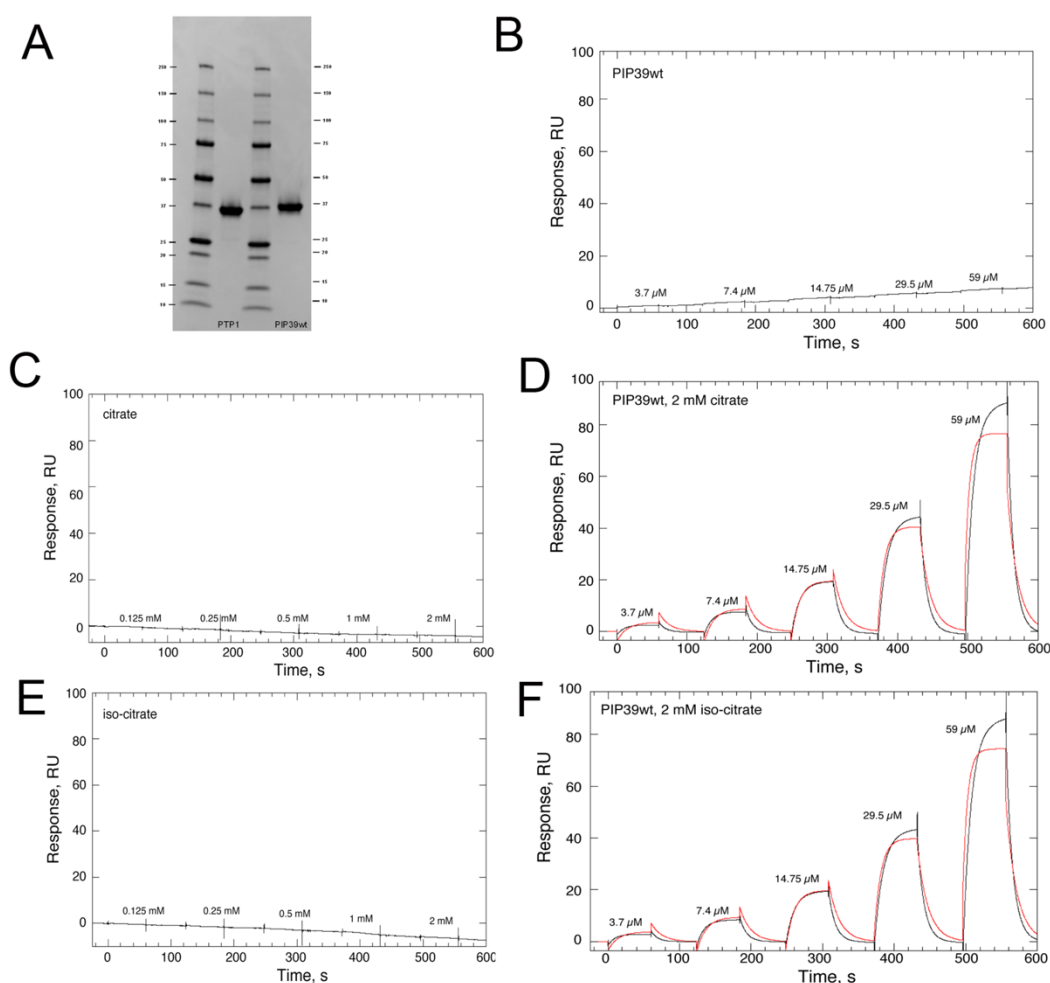

**Figure S5**

Citrate and isocitrate allow interaction between *Tb*PIP39 and *Tb*PTP1.

- Purified *Tb*PTP1 and *Tb*PIP39wt used in these interaction assays
- 2-fold dilution of *PIP39wt* from 59  $\mu$ M - 3.7  $\mu$ M in the absence of either citrate or iso-citrate subjected to surface plasmon resonance on a *Tb*PTP1 surface and analysed using a T200 BIAcore.
- 2-fold dilution of citrate alone from 2 mM - 0.125 mM subjected to surface plasmon resonance on a *Tb*PTP1 surface and analysed using a T200 BIAcore.
- 2-fold dilution of *Tb*PIP39wt from 59  $\mu$ M - 3.7  $\mu$ M in the presence of 2 mM citrate subjected to surface plasmon resonance on a *Tb*PTP1 surface and analysed using a T200 BIAcore.
- 2-fold dilution of iso-citrate alone from 2 mM - 0.125 mM subjected to surface plasmon resonance on a *Tb*PTP1 surface and analysed using a T200 BIAcore.
- 2-fold dilution of *PIP39wt* in from 59  $\mu$ M - 3.7  $\mu$ M in the presence of 2 mM iso-citrate subjected to surface plasmon resonance on a *Tb*PTP1 surface and analysed using a T200 BIAcore.

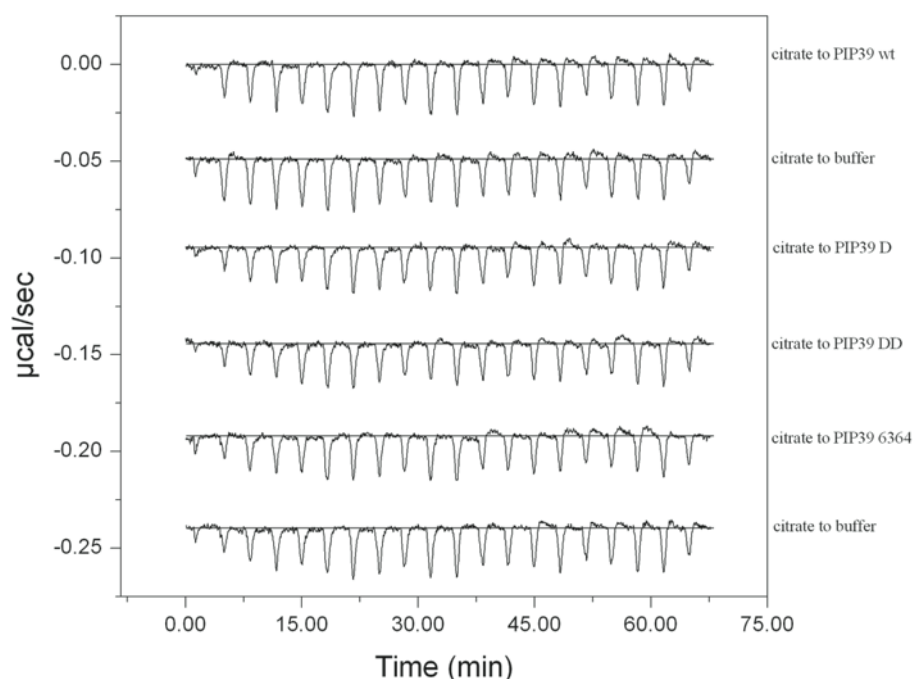

**Figure S6**

Calorimetric titration of citrate into recombinant TbPIP39 wt, D, DD and 6364 mutants.

*TbPIP39* wt, D, DD or 6364 mutants were desalted into *ITC buffer* (10 mM Hepes, pH7.3; 0.05% P20; 20 mM MgCl<sub>2</sub> and 2mM DTT) on a pre-equilibrated 5ml HiTrap desalting column (GE Healthcare). After a preliminary injection of 2  $\mu$ l, nineteen 15  $\mu$ l aliquots of 2 mM citrate in *ITC buffer* were injected into 1.41 ml of 5  $\mu$ M *TbPIP39* wt, D, DD or 6364 mutants at 25 °C using an AutoITC instrument (MicroCal). The experimental parameters were as follows: injection time 30s; 200s inter-injection delay, stirring 250 rpm and power setting 5. Control experiments were carried out in which 2 mM citrate in ITC buffer was injected into ITC buffer to determine heat of dilution for 2 mM citrate in ITC buffer. Each peak represents the injection of a 15  $\mu$ l aliquot of 2 mM citrate into 1.41 ml of 5  $\mu$ M *TbPIP39* at 25 °C in 10 mM Hepes, pH7.3; 0.05% P20; 20 mM MgCl<sub>2</sub> and 2mM DTT. No difference was observed in the presence of *TbPIP39* or buffer only, demonstrating an absence of detectable citrate binding.

For Figures S5 and S6 recombinant proteins were produced and purified as follows: Recombinant proteins were expressed and purified to homogeneity from BL21 (DE3) Star *E. coli* (Invitrogen), grown shaking (260 rpm) at 30 °C for 16 hrs in EnPresso Medium (BioSilta) containing carbenicillin (100  $\mu$ g.mL<sup>-1</sup>). Cell pellets of His-PTP1 were resuspended in 20 mM NaH<sub>2</sub>PO<sub>4</sub>, pH 7.4; 500 mM NaCl; 20 mM Imidazole; plus protease inhibitors at 10 % wt/vol, and lysed

by a single passage through a Constant Systems Cell Disruptor (1.1 kW TS Benchtop) set at 22 kpsi, followed by centrifugation at 50,000g for 1hr at 4 °C. The filtered (0.22 µm) supernatant was loaded onto an ÅKTA Purifier (GE Healthcare) fitted with a 1ml HiTrap IMAC FF column (GE Healthcare) and an HiPrep S200 16/60 HR (GE Healthcare), run with standard configuration and settings for a 2-step affinity-gel-filtration protocol. Buffers used for the purification were; *IMAC Loading buffer*: 20 mM NaH<sub>2</sub>PO<sub>4</sub>, pH 7.4; 500 mM NaCl; 20 mM Imidazole; 100 µM PMSF. *IMAC Elution buffer*: 20 mM NaH<sub>2</sub>PO<sub>4</sub>, pH 7.4; 500 mM NaCl; 500 mM Imidazole. *Gel-Filtration Buffer*: 10 mM HEPES, pH 7.5; 150 mM NaCl; 0.05% P20; 50 µM EDTA; 20 mM MgCl<sub>2</sub>. GST-PIP39wt, GST-PIP39 D, GST-PIP39 DD and GST-PIP39 6364 were resuspended in 20 mM HEPES, pH7.5; 150 mM NaCl, 1mM DTT; 5 % glycerol plus protease inhibitors at 10 % wt/vol, and lysed by a single passage through a Constant Systems Cell Disruptor (1.1 kW TS Benchtop) set at 22 kpsi, followed by centrifugation at 50,000 x g for 1hr at 4 °C. The filtered (0.22 µm) supernatant was loaded onto an ÅKTA Purifier (GE Healthcare) fitted with a 1ml GSTrap FF column (GE Healthcare) and an HiPrep S200 16/60 HR (GE Healthcare), run with standard configuration and settings for a 2-step affinity-gel-filtration protocol. Buffers used for the purification were; *GSTrap Loading buffer*: 20 mM HEPES, pH7.5; 150 mM NaCl, 1mM DTT; 5 % glycerol. *GSTrap Elution buffer* 20 mM HEPES, pH7.5; 150 mM NaCl, 1mM DTT; 5 % glycerol; 20 mM reduced glutathione. *Gel-Filtration Buffer*: 10 mM HEPES, pH 7.5; 150 mM NaCl; 0.05% P20; 50 µM EDTA; 20 mM MgCl<sub>2</sub>.
